# Supplementary material
Source: publisher site journal article supplement (https://www.dovepress.com/article/336632)
Supplement: Supplementary file 1 [file get_supplementary_file.php]

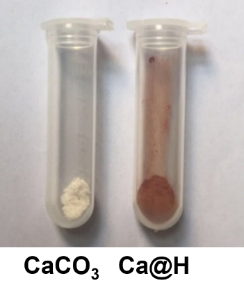


**Figure S1** Photographes of CaCO3 and Ca@H.


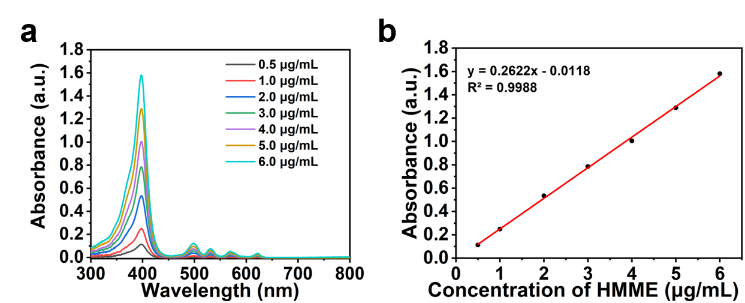


**Figure S2** (a) UV-vis spectra of HMME at elevated concentrations. (b) The standard UV-vis absorbance spectra curve of HMME at 398 nm.


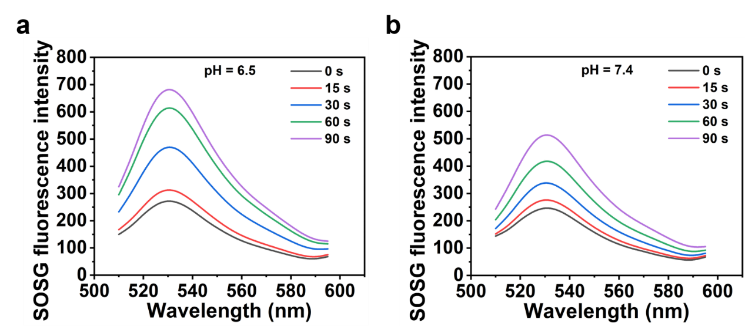


**Figure S3** (a) Time-dependent ROS generation of Ca@H (pH = 6.5). (b) Time-dependent ROS generation of Ca@H (pH = 7.4).


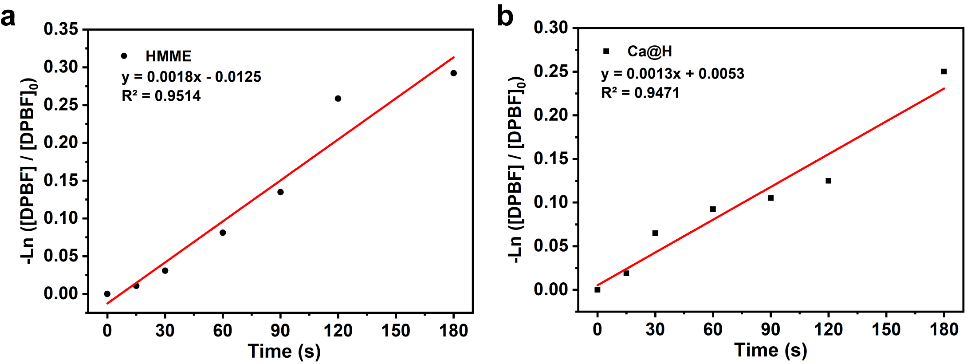


**Figure S4.** Rate constants of DPBF decomposition in presence of HMME and Ca@H after US irradiation (a-b).


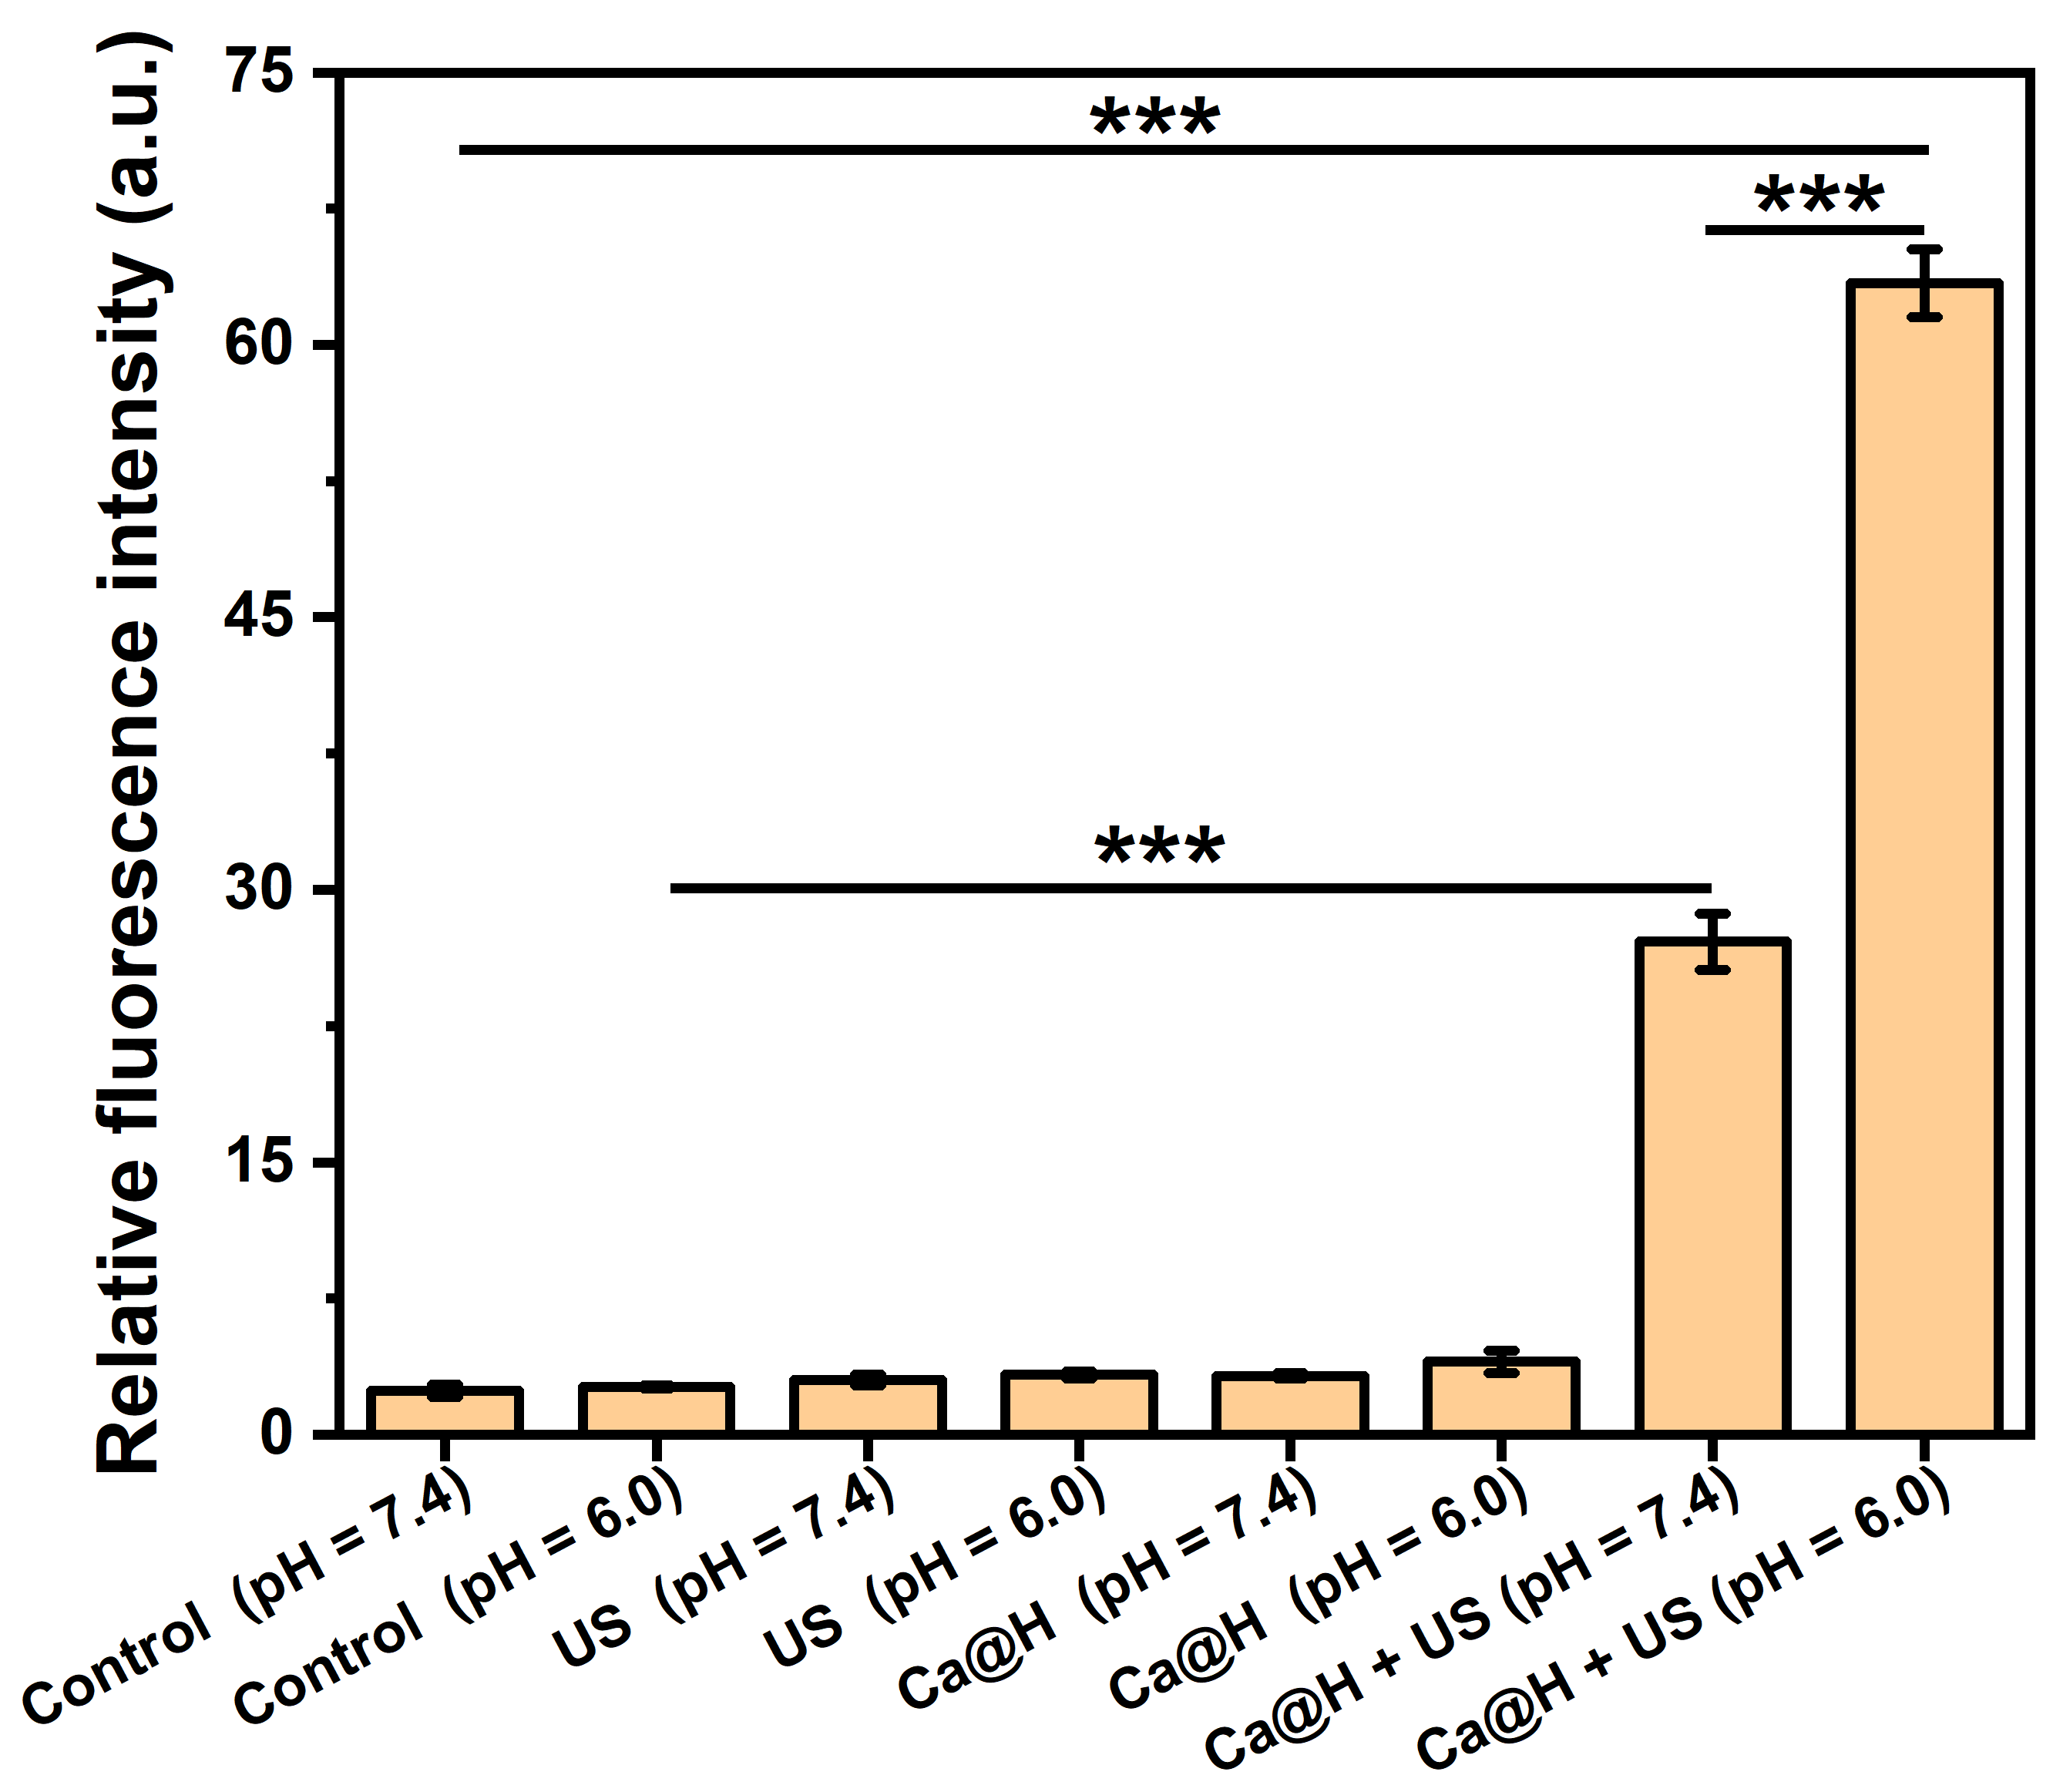


**Figure S5** Relative fluorescence intensities measured by Image J for Figure 3c (n = 3, *t* test, ***p < 0.001).


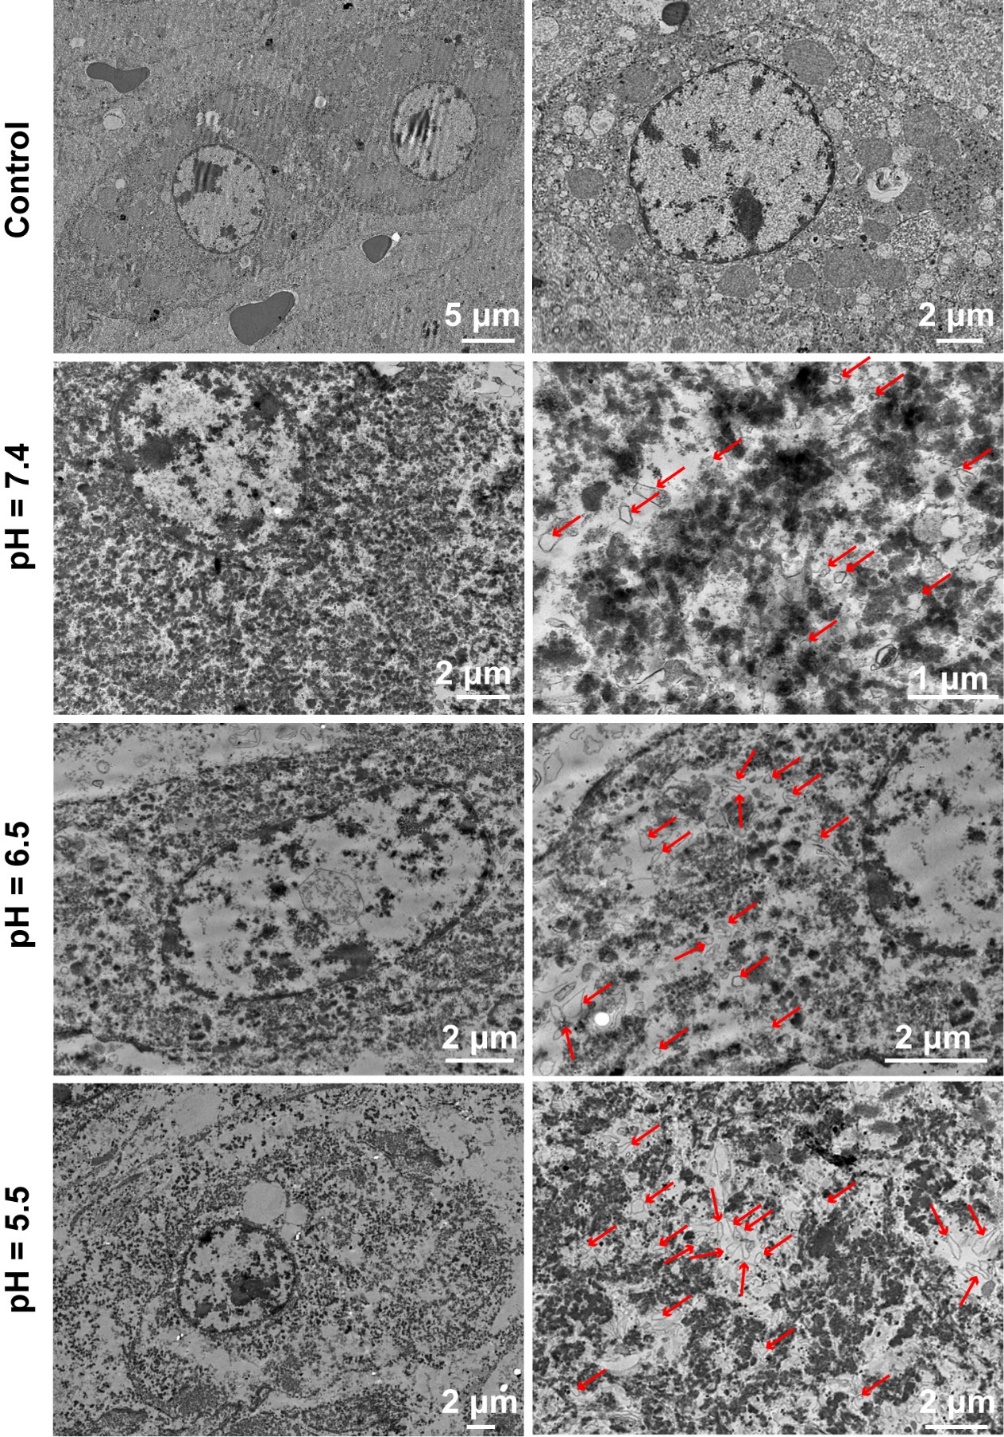


**Figure S6** TEM images of bovine liver tissue after HIFU ablation (the red arrows indicate cell vacuolization).


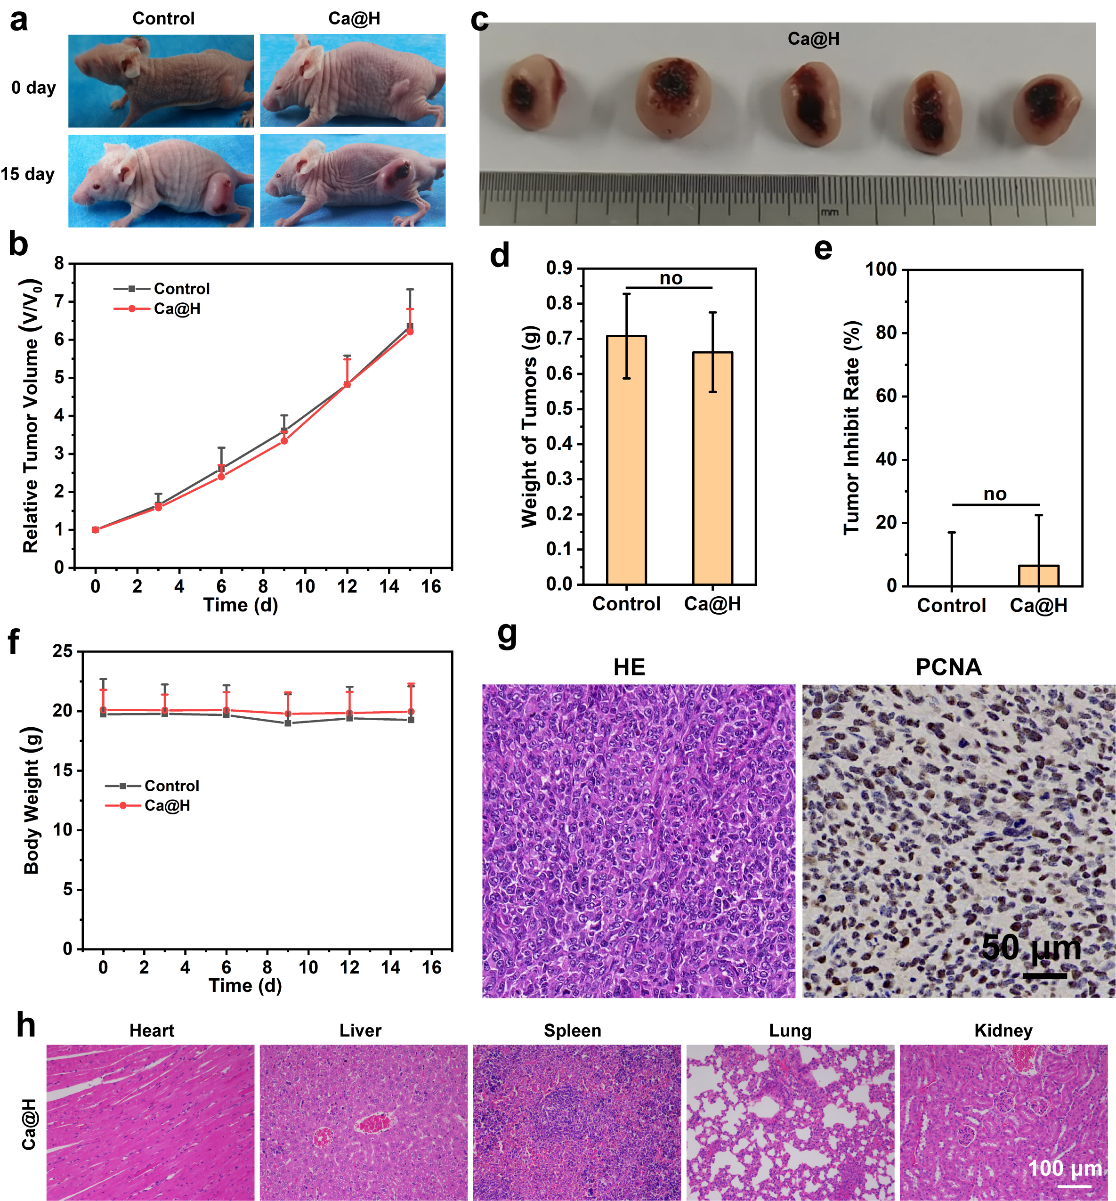


**Figure S7** (a) Digital photos of 4T1 tumor bearing mice before and post Ca@H NPs treatment. (b) Tumor growth curve of 4T1 tumor-bearing mice after Ca@H NPs treatment. (c) Digital photo of tumors after Ca@H NPs treatment (n = 5). (d) Weight of tumor tissues excised from the Ca@H NPs-treated group (n = 5, *t* test, no: Not statistically significant). (e) Tumor inhibition rate after Ca@H NPs treatment (n = 5, *t* test, no: Not statistically significant). (f) Body weight of mice during the therapeutic period (n = 5). (g) H&E and PCNA stanning of tumor tissues after Ca@H NPs treatment. (h) H&E staining of major organs of mice after Ca@H NPs treatment.


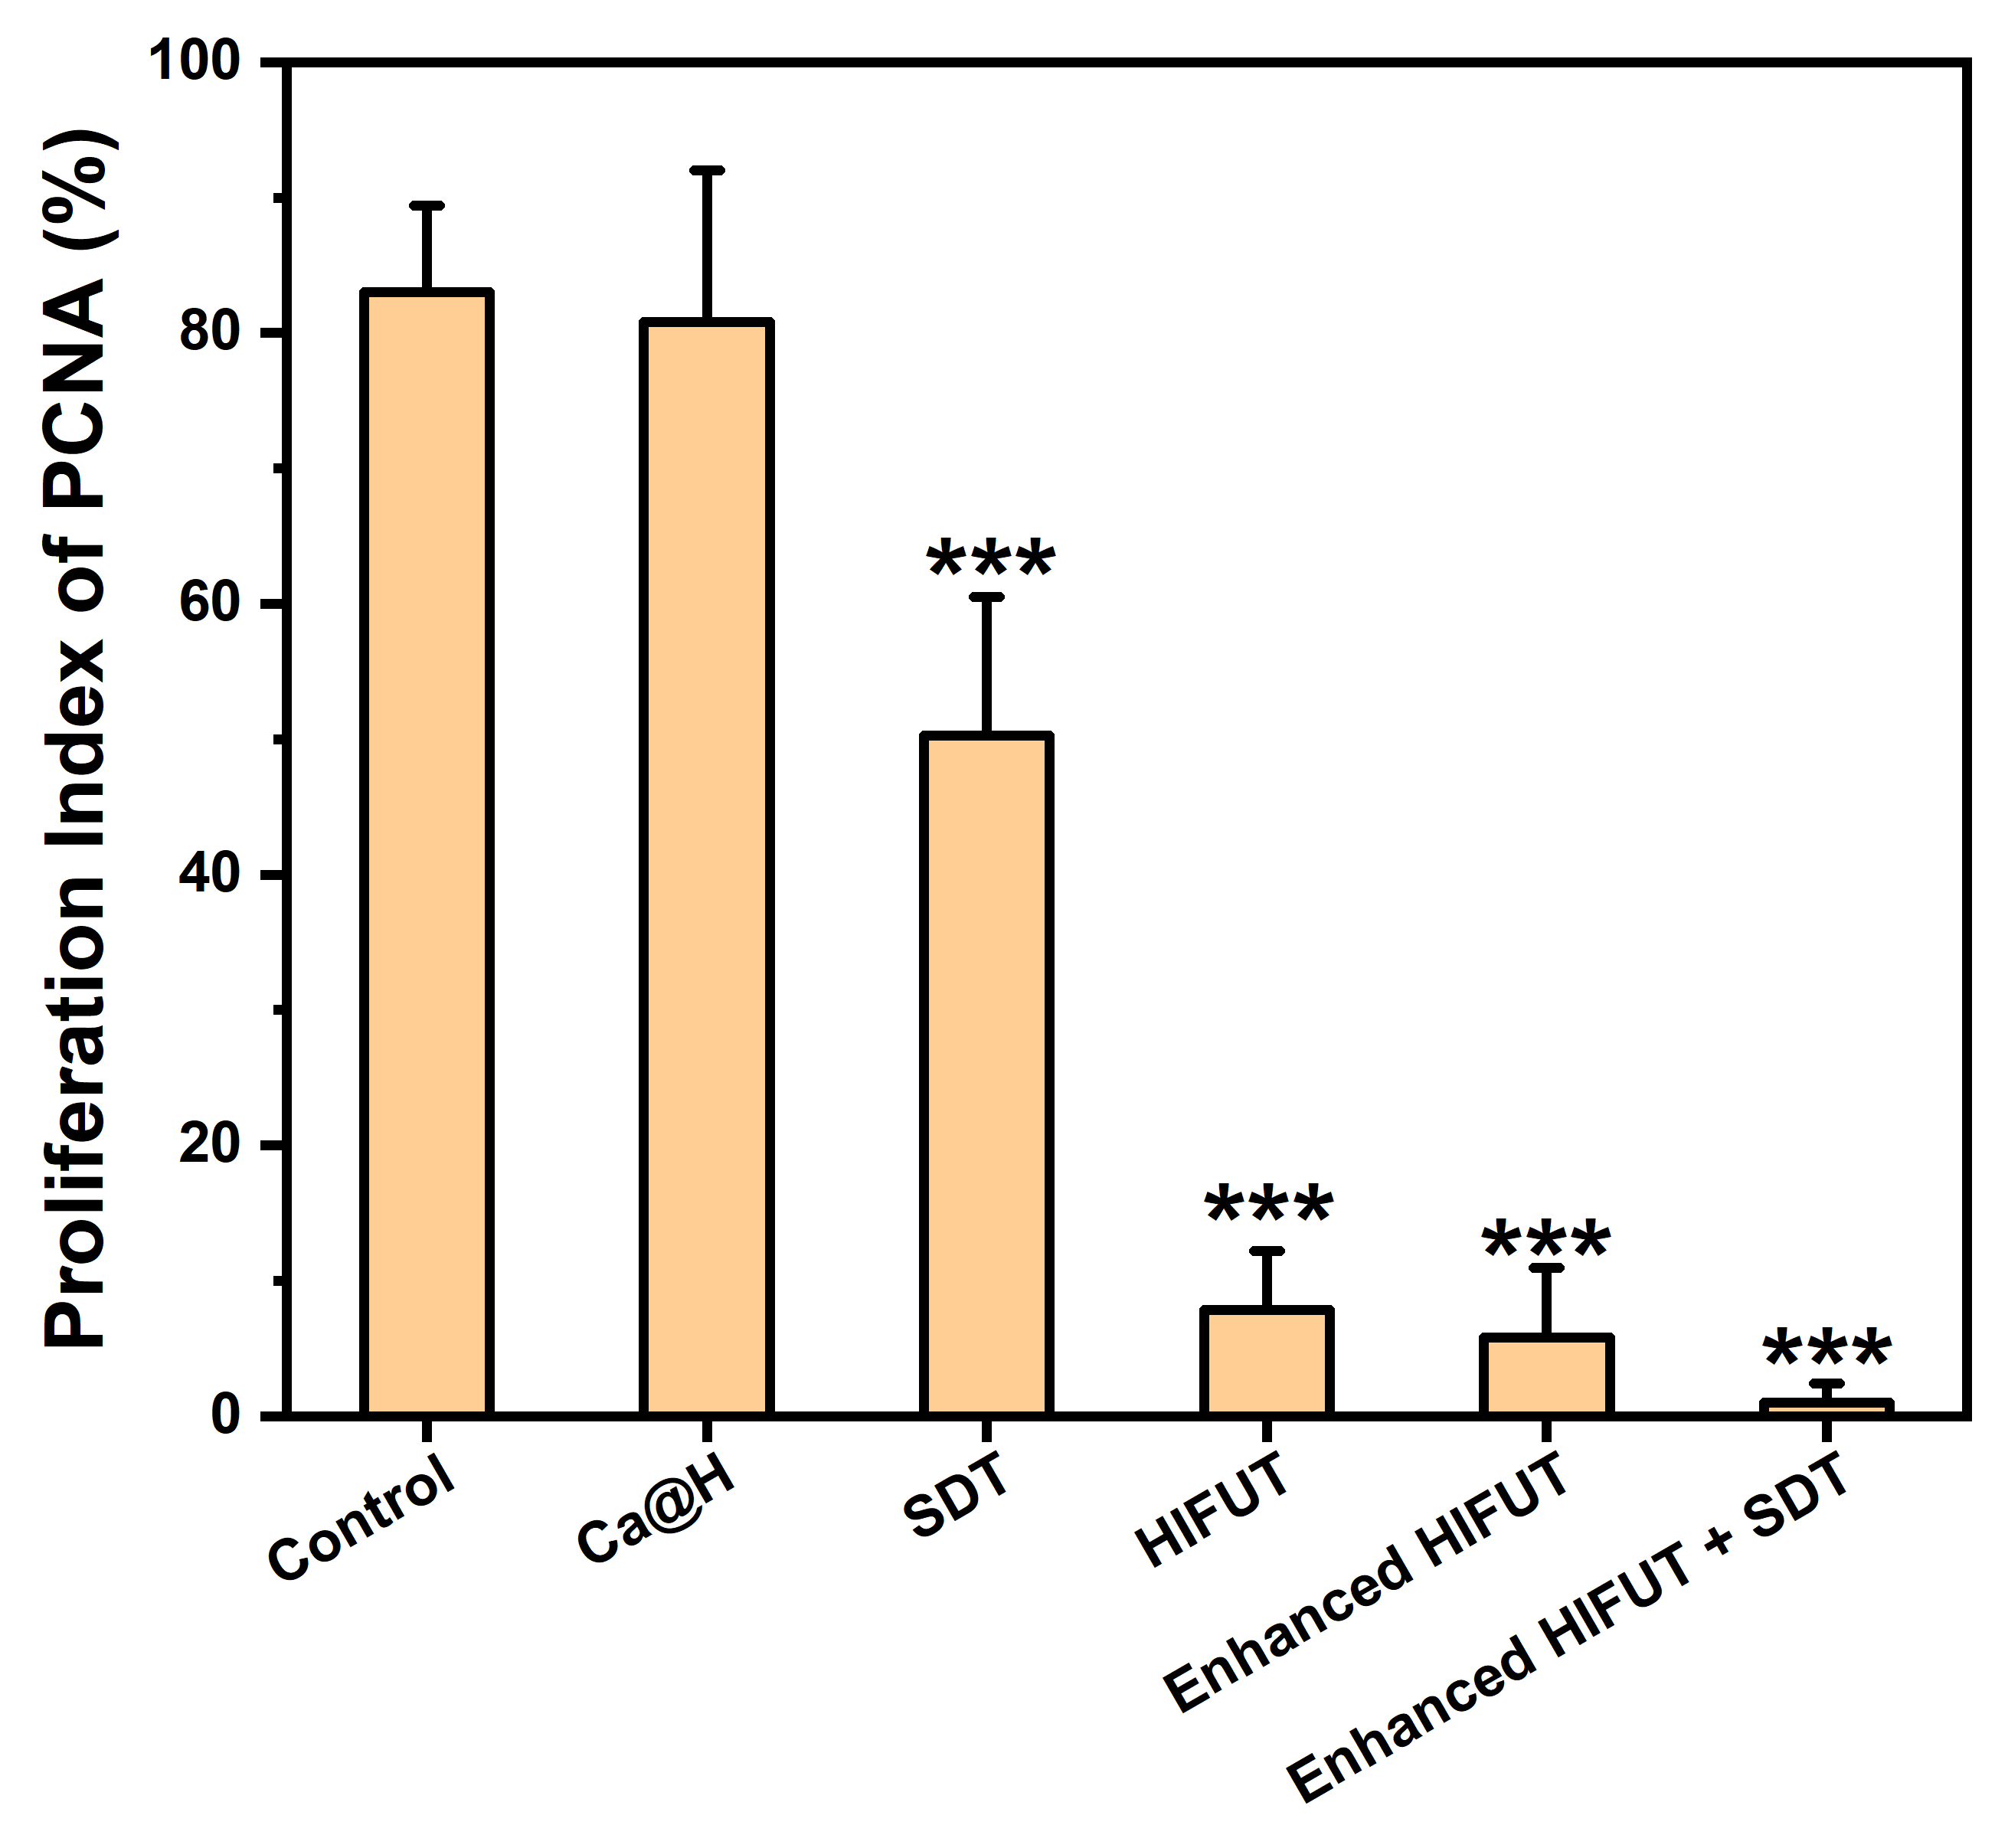


**Figure S8** Proliferation index of PCNA after various treatments (n = 5, *t* test, ***p < 0.001).
